# Supplementary material for: Variable-valence element doping mediated photogenerated electron trapping for selective oxidation reactions
Source: Royal Society of Chemistry journal article supplement (doi:10.1039/d4ey00024b), 2024-01-01
Supplement: d4ey00024b1.pdf [file d4ey00024b1.pdf]

## **Variable-valence element doping mediated photogenerated electron trapping for selective oxidation reactions**

**Xia Zhong<sup>+</sup>, Yan Zhao<sup>+</sup>, Lei Li, Xin He, Hui Wang\*, Xiaodong Zhang\* and Yi Xie\***

Hefei National Research Center for Physical Sciences at the Microscale, University of Science and Technology of China, Hefei, Anhui 230026, China

<sup>+</sup> These authors contributed equally to this work.

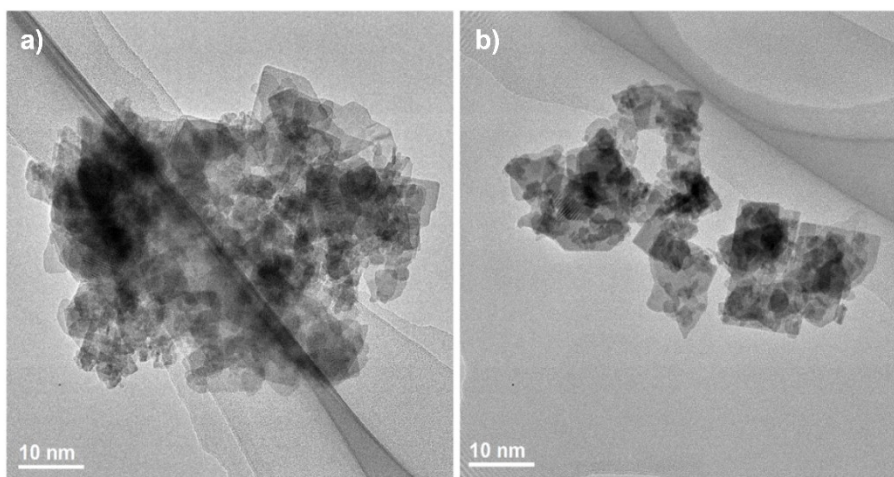

**Fig. S1** TEM images of (a) Bi<sub>2</sub>WO<sub>6</sub> and (b) Cu-Bi<sub>2</sub>WO<sub>6</sub>.

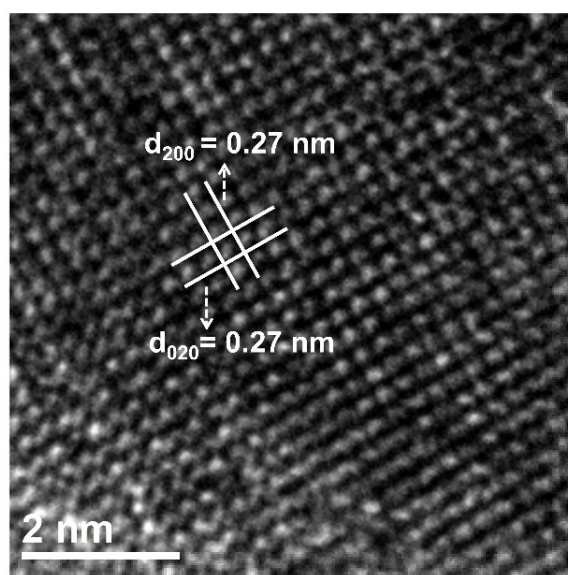

**Fig. S2** HRTEM image of Bi<sub>2</sub>WO<sub>6</sub>.

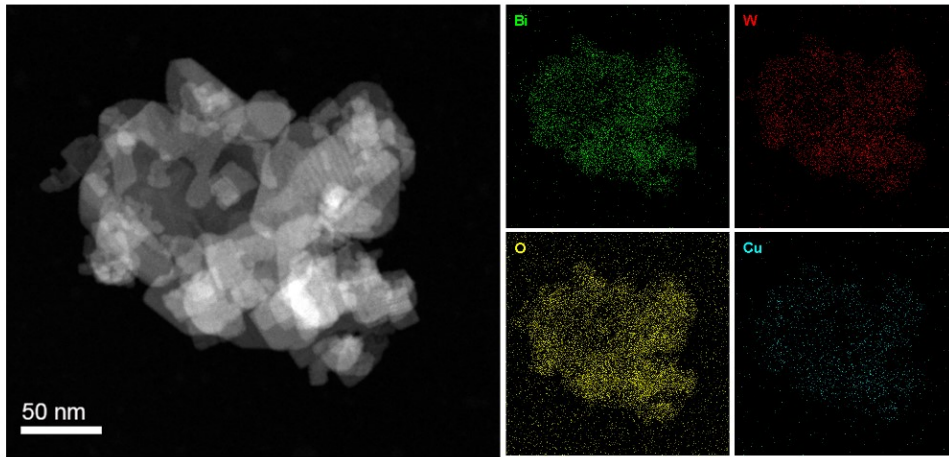

**Fig. S3** HAADF-STEM images and the corresponding EDS mapping images of Cu-Bi<sub>2</sub>WO<sub>6</sub>.

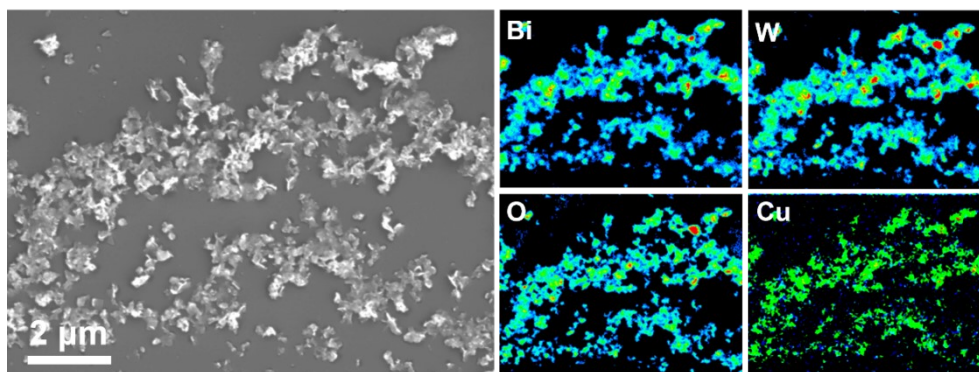

**Fig. S4** EPMA analysis of the relevant elements of Cu-Bi<sub>2</sub>WO<sub>6</sub>.

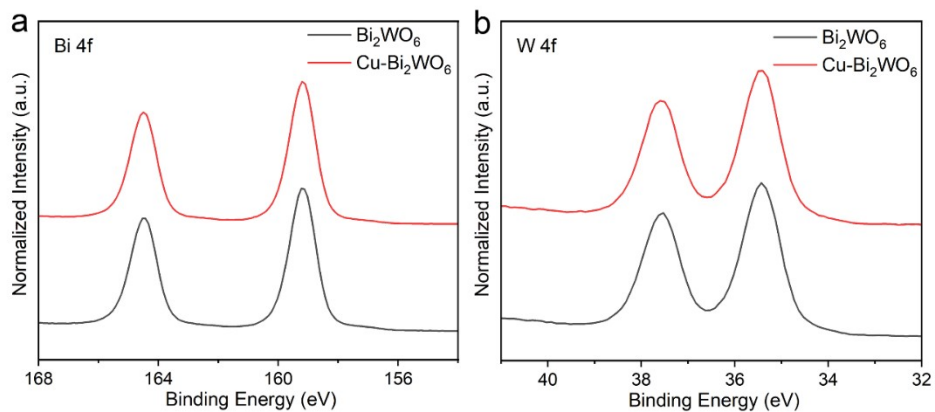

**Fig. S5** XPS spectra of  $\text{Bi}_2\text{WO}_6$  and  $\text{Cu-Bi}_2\text{WO}_6$ . (a) Bi 4f, (b) W 4f.

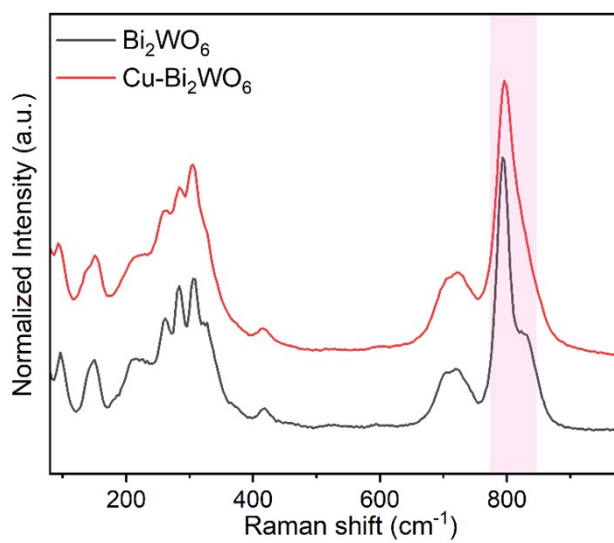

**Fig. S6** Raman spectra of  $\text{Bi}_2\text{WO}_6$  and  $\text{Cu-Bi}_2\text{WO}_6$ .

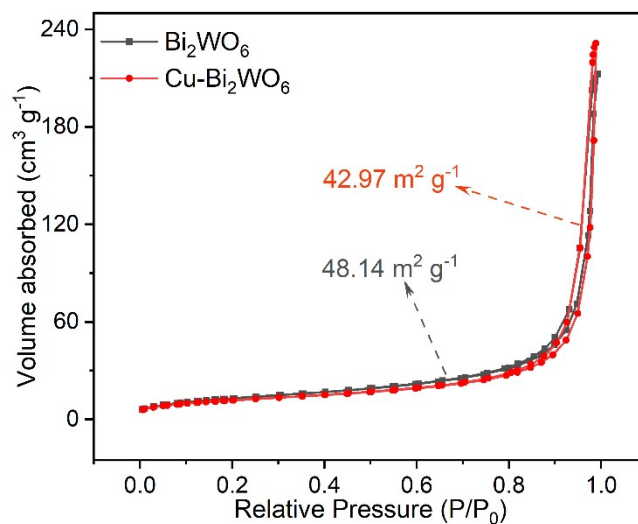

**Fig. S7** N<sub>2</sub> adsorption/desorption isotherms of Bi<sub>2</sub>WO<sub>6</sub> and Cu-Bi<sub>2</sub>WO<sub>6</sub>.

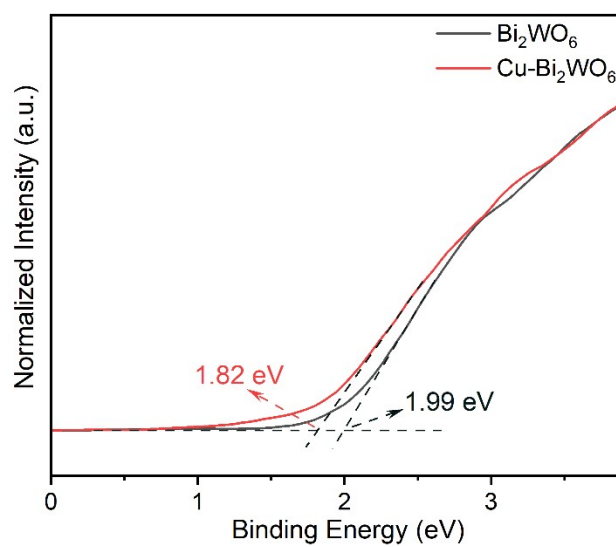

**Fig. S8** XPS valence band spectra of Bi<sub>2</sub>WO<sub>6</sub> and Cu-Bi<sub>2</sub>WO<sub>6</sub>.

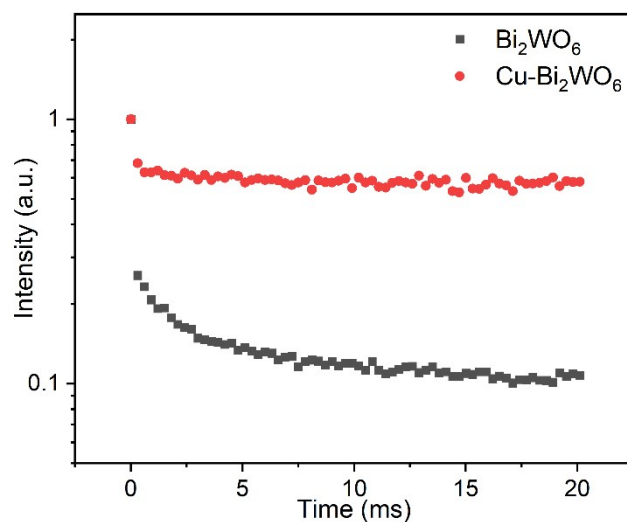

**Fig. S9** Low-temperature (10 K) time-resolved phosphorescence (PH) spectra of  $\text{Bi}_2\text{WO}_6$  and  $\text{Cu-Bi}_2\text{WO}_6$ .

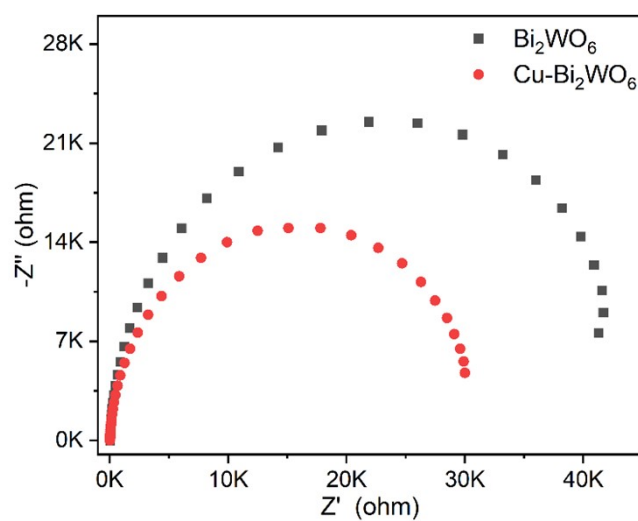

**Fig. S10** Electrochemical impedance spectroscopy of  $\text{Bi}_2\text{WO}_6$  and  $\text{Cu-Bi}_2\text{WO}_6$ .

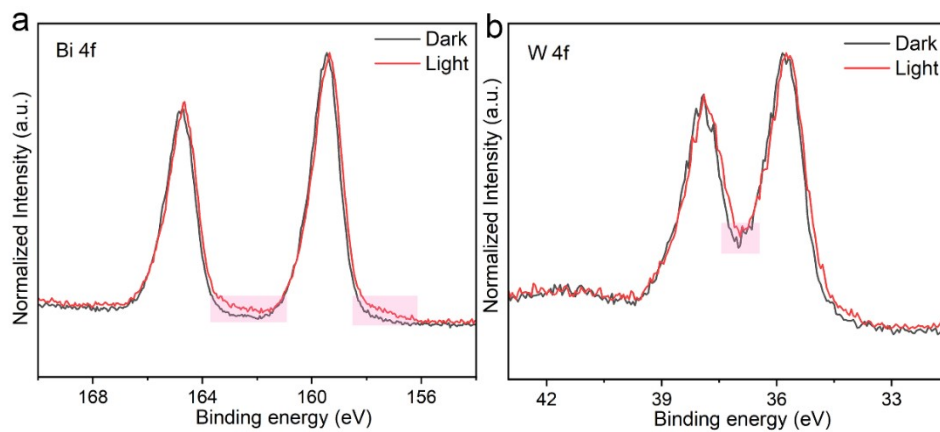

**Fig. S11** *In-situ* high resolution XPS spectra of Bi 4f and W 4f of Cu-Bi<sub>2</sub>WO<sub>6</sub>.

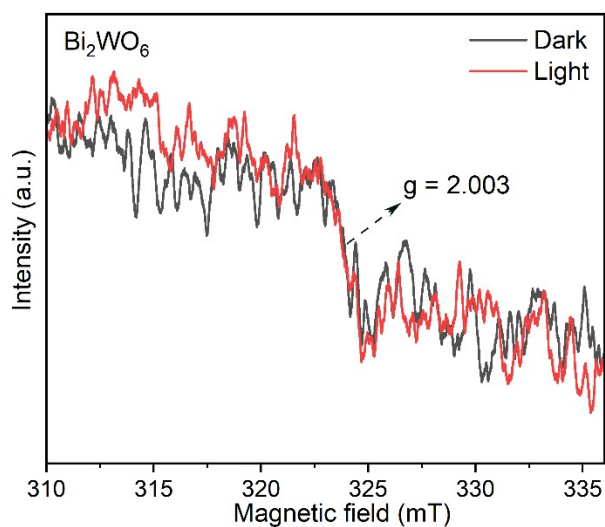

**Fig. S12** *In-situ* ESR spectra of Bi<sub>2</sub>WO<sub>6</sub> under dark and illumination conditions.

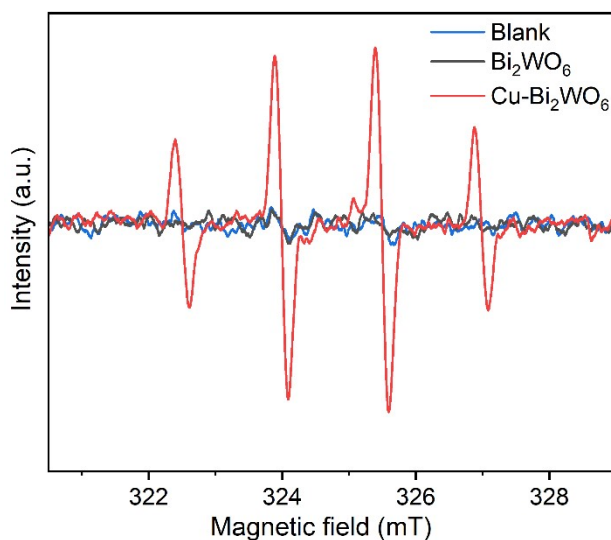

**Fig. S13** ESR spectra of different samples in the presence of DMPO in water.

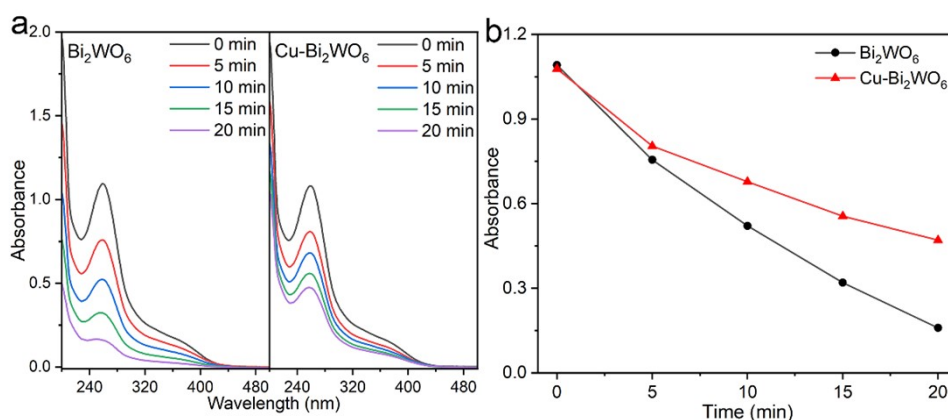

**Fig. S14** (a) Time-dependent absorption spectra of NBT reduction for Bi<sub>2</sub>WO<sub>6</sub> and Cu-Bi<sub>2</sub>WO<sub>6</sub>. (b) Evolutions of the absorbance peak monitored at 260 nm.

The  $\bullet\text{O}_2^-$  can be detected by nitro blue tetrazolium (NBT), which could be reduced by  $\bullet\text{O}_2^-$ , resulting in decrease of absorbance spectra.<sup>1</sup> The time-dependent absorption curve shows that Cu-Bi<sub>2</sub>WO<sub>6</sub> has a weaker ability to generate  $\bullet\text{O}_2^-$  due to the trapping of photogenerated electrons at the Cu sites.



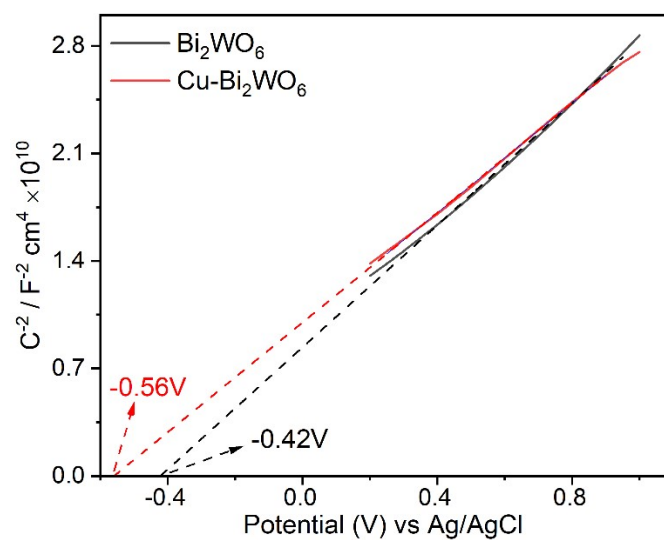

**Fig. S15** Mott-Schottky plots of  $\text{Bi}_2\text{WO}_6$  and  $\text{Cu-Bi}_2\text{WO}_6$ .

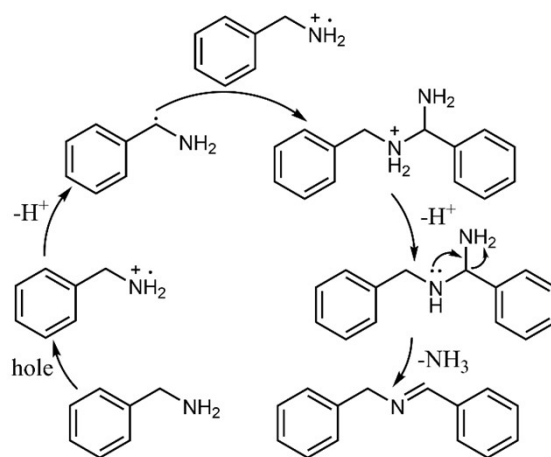

**Fig. S16** Schematic diagram of hole-mediated oxidative coupling of amines to imines.<sup>2</sup>

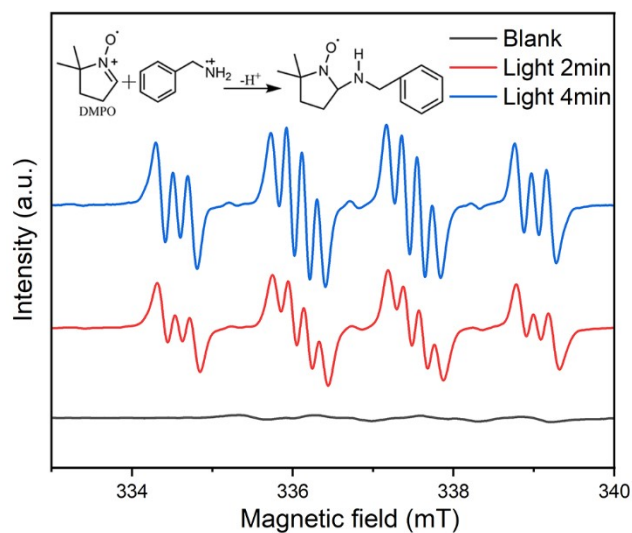

**Fig. S17** *In-situ* ESR spectra of DMPO–C<sub>6</sub>H<sub>5</sub>CH<sub>2</sub>NH<sub>2</sub><sup>+</sup> for Cu-Bi<sub>2</sub>WO<sub>6</sub>.

*In-situ* ESR spectroscopy measurements utilizing 5,5-dimethyl-1-pyrroline N-oxide (DMPO) as a spin-trapping agent provide direct evidence of C<sub>6</sub>H<sub>5</sub>CH<sub>2</sub>NH<sub>2</sub><sup>+</sup> generation. Under irradiation, a specific signal attributed to a DMPO–C<sub>6</sub>H<sub>5</sub>CH<sub>2</sub>NH<sub>2</sub><sup>+</sup> spin adduct was clearly observed for Cu-Bi<sub>2</sub>WO<sub>6</sub>, and the signal intensity increased gradually with irradiation time.

## References

- 1 Y. Nosaka and A. Y. Nosaka, *Chem. Rev.*, 2017, **117**, 11302–11336.
- 2 H. Liu, C. Xu, D. Li, and H. Jiang, *Angew. Chem., Int. Ed.*, 2018, **57**, 5379–5383.
- 3 W. Liu, Y. Wang, H. Huang, J. Wang, G. He, J. Feng, T. Yu, Z. Li, and Z. Zou, *J. Am. Chem. Soc.*, 2022, **144**, 23396–23404.
